# Supplementary material for: The demographic decline of a sea lion population followed multi-decadal sea surface warming
Source: PubMed Central journal article supplement (PMC7320179; doi:10.1038/s41598-020-67534-0), 2020-06-26
Supplement: 41598_2020_67534_MOESM2_ESM.pdf [file 41598_2020_67534_MOESM2_ESM.pdf]

## Supplementary Information Table

### The demographic decline of a sea lion population followed multi-decadal sea surface warming

Karen Adame<sup>a,b</sup>, Fernando R. Elorriaga-Verplancken<sup>b</sup>, Emilio Beier<sup>a</sup>, Karina Acevedo-Whitehouse<sup>c</sup>, and Mario A. Pardo<sup>d,1</sup>

- Centro de Investigación Científica y de Educación Superior de Ensenada (CICESE), Unidad La Paz, Laboratorio de Macroecología Marina. La Paz, Baja California Sur 23050, México.
- Instituto Politécnico Nacional, Centro Interdisciplinario de Ciencias Marinas, Avenida Instituto Politécnico Nacional s/n, Colonia Playa Palo de Santa Rita, Apartado Postal 592, CP 23096, La Paz, Baja California Sur, Mexico.
- Unit for Basic and Applied Microbiology. School of Natural Sciences. Autonomous University of Queretaro, Queretaro 76230, Mexico.
- Consejo Nacional de Ciencia y Tecnología (CONACYT) – CICESE, Unidad La Paz, Laboratorio de Macroecología Marina. La Paz, Baja California Sur 23050, Mexico.
- Corresponding author. Email: [mpardo@cicese.mx](mailto:mpardo@cicese.mx). Phone: +52(1)612-1213031 ext. 28116. ORCID: 0000-0003-1248-3399.

**Table S1** - California sea lion counts, used in this study, in the reproductive colonies of the Gulf of California, during the breeding season. The colonies are numbered from north to south, as portrayed in Fig. 1 (see references in the Main Manuscript).

| Year | Reproductive colony | Total count (visual) | Pup count (visual) | Total count (drone) | Pup count (drone) | Study                      |
|------|---------------------|----------------------|--------------------|---------------------|-------------------|----------------------------|
| 1978 | 13. Los Islotes     | 165                  | 40                 | -                   | -                 | Aurioles & Le Boeuf (1991) |
| 1979 | 2. San Jorge        | 3253                 | 1030               | -                   | -                 | Le Boeuf et al. (1983)     |
|      | 2. San Jorge        | 3253                 | 130                | -                   | -                 | Aurioles & Le Boeuf (1991) |
|      | 4. Granito          | 1102                 | 337                | -                   | -                 | Le Boeuf et al. (1983)     |
|      | 5. Cantiles         | 1810                 | 446                | -                   | -                 | Le Boeuf et al. (1983)     |
|      | 6. Machos           | 1316                 | 168                | -                   | -                 | Le Boeuf et al. (1983)     |
|      | 9. San Esteban      | 3961                 | 820                | -                   | -                 | Le Boeuf et al. (1983)     |
|      | 10. S.P. Martir     | 1634                 | 321                | -                   | -                 | Le Boeuf et al. (1983)     |
|      | 11. S.P. Nolasco    | 846                  | 232                | -                   | -                 | Le Boeuf et al. (1983)     |
|      | 13. Los Islotes     | 138                  | 28                 | -                   | -                 | Le Boeuf et al. (1983)     |
|      | 13. Los Islotes     | 157                  | 39                 | -                   | -                 | Aurioles & Le Boeuf (1991) |
| 1980 | 13. Los Islotes     | 159                  | 38                 | -                   | -                 | Aurioles & Le Boeuf (1991) |
| 1981 | 1. Consag           | 421                  | 10                 | -                   | -                 | Le Boeuf et al. (1983)     |

|             |                  |      |      |   |   |                                 |
|-------------|------------------|------|------|---|---|---------------------------------|
|             | 2. San Jorge     | 3344 | 457  | - | - | Le Boeuf et al. (1983)          |
|             | 5. Cantiles      | 1380 | 270  | - | - | Le Boeuf et al. (1983)          |
|             | 11. S.P. Nolasco | 1126 | 125  | - | - | Le Boeuf et al. (1983)          |
|             | 12. Farallon     | 323  | 64   | - | - | Le Boeuf et al. (1983)          |
|             | 13. Los Islotes  | 150  | 46   | - | - | Aurioles & Le Boeuf (1991)      |
| <b>1982</b> | 12. Farallon     | 702  | 248  | - | - | Aurioles & Le Boeuf (1991)      |
|             | 13. Los Islotes  | 177  | 54   | - | - | Aurioles & Le Boeuf (1991)      |
| <b>1983</b> | 2. San Jorge     | 3663 | 907  | - | - | Aurioles & Le Boeuf (1991)      |
|             | 11. S.P. Nolasco | 832  | 150  | - | - | Aurioles & Le Boeuf (1991)      |
|             | 12. Farallon     | 551  | 222  | - | - | Aurioles & Le Boeuf (1991)      |
|             | 13. Los Islotes  | 143  | 50   | - | - | Aurioles & Le Boeuf (1991)      |
| <b>1984</b> | 3. Lobos         | 3117 | 600  | - | - | Aurioles-Gamboa & Zavala (1994) |
|             | 11. S.P. Nolasco | 757  | 127  | - | - | Aurioles & Le Boeuf (1991)      |
|             | 13. Los Islotes  | 154  | 49   | - | - | Aurioles & Le Boeuf (1991)      |
| <b>1985</b> | 2. San Jorge     | 3413 | 791  | - | - | Aurioles-Gamboa & Zavala (1994) |
|             | 13. Los Islotes  | 176  | 52   | - | - | Aurioles & Le Boeuf (1991)      |
| <b>1990</b> | 2. San Jorge     | 6159 |      | - | - | Maravilla et al. (2006)         |
|             | 4. Granito       | 1387 |      | - | - | Maravilla et al. (2006)         |
|             | 5. Cantiles      | 1239 |      | - | - | Maravilla et al. (2006)         |
|             | 6. Machos        | 1507 | 374  | - | - | Aurioles-Gamboa & Zavala (1994) |
|             | 6. Machos        | 1072 |      | - | - | Maravilla et al. (2006)         |
|             | 8. Rasito        | 355  |      | - | - | Maravilla et al. (2006)         |
|             | 9. San Esteban   | 5236 | 1938 | - | - | Aurioles-Gamboa & Zavala (1994) |
|             | 9. San Esteban   | 4234 |      | - | - | Maravilla et al. (2006)         |
|             | 10. S.P. Martir  | 1450 |      | - | - | Maravilla et al. (2006)         |
|             | 11. S.P. Nolasco | 1039 |      | - | - | Maravilla et al. (2006)         |
|             | 13. Los Islotes  | 153  |      | - | - | Maravilla et al. (2006)         |
| <b>1991</b> | 4. Granito       | 1662 | 158  | - | - | Aurioles-Gamboa & Zavala (1994) |
|             | 5. Cantiles      | 1310 | 389  | - | - | Aurioles-Gamboa & Zavala (1994) |
|             | 7. Partido       | 912  | 26   | - | - | Aurioles-Gamboa & Zavala (1994) |
|             | 8. Rasito        | 430  | 77   | - | - | Aurioles-Gamboa & Zavala (1994) |
|             | 10. S.P. Martir  | 1843 | 464  | - | - | Aurioles-Gamboa & Zavala (1994) |
|             | 11. S.P. Nolasco | 1193 | 184  | - | - | Aurioles-Gamboa & Zavala (1994) |
| <b>1993</b> | 13. Los Islotes  | 291  | 82   | - | - | Aurioles-Gamboa & Zavala (1994) |
| <b>1997</b> | 11. S.P. Nolasco | 659  | 171  | - | - | Szteren et al. (2006)           |

|             |                  |      |      |      |      |                       |
|-------------|------------------|------|------|------|------|-----------------------|
| <b>2002</b> | 1. Consag        | 600  | 140  | -    | -    | Szteren et al. (2006) |
| <b>2004</b> | 2. San Jorge     | 3833 | 968  | -    | -    | Szteren et al. (2006) |
|             | 3. Lobos         | 1950 | 195  | -    | -    | Szteren et al. (2006) |
|             | 4. Granito       | 848  | 246  | -    | -    | Szteren et al. (2006) |
|             | 5. Cantiles      | 634  | 144  | -    | -    | Szteren et al. (2006) |
|             | 6. Machos        | 580  | 102  | -    | -    | Szteren et al. (2006) |
|             | 7. Partido       | 449  | 82   | -    | -    | Szteren et al. (2006) |
|             | 8. Rasito        | 375  | 55   | -    | -    | Szteren et al. (2006) |
|             | 9. San Esteban   | 5666 | 1748 | -    | -    | Szteren et al. (2006) |
|             | 10. S.P. Martir  | 1171 | 247  | -    | -    | Szteren et al. (2006) |
|             | 12. Farallon     | 280  | 73   | -    | -    | Szteren et al. (2006) |
|             | 13. Los Islotes  | 439  | 143  | -    | -    | Szteren et al. (2006) |
| <b>2012</b> | 13. Los Islotes  | 428  | 84   | -    | -    | Adame et al. (2017)   |
| <b>2013</b> | 13. Los Islotes  | 470  | 120  | -    | -    | Adame et al. (2017)   |
|             | 13. Los Islotes  | 353  | 78   | -    | -    | Adame et al. (2017)   |
|             | 13. Los Islotes  | 448  | 40   | -    | -    | Adame et al. (2017)   |
| <b>2014</b> | 13. Los Islotes  | 515  | 155  | -    | -    | Adame et al. (2017)   |
|             | 13. Los Islotes  | 458  | 57   | -    | -    | Adame et al. (2017)   |
| <b>2015</b> | 13. Los Islotes  | 292  | 9    | -    | -    | Adame et al. (2017)   |
|             | 13. Los Islotes  | 326  | 50   | 547  | 189  | Adame et al. (2017)   |
| <b>2016</b> | 1. Consag        | 279  | 22   | 486  | 91   | This study            |
|             | 2. San Jorge     | 1771 | 357  | 3385 | 1043 | This study            |
|             | 3. Lobos         | 833  | 101  | 1901 | 388  | This study            |
|             | 4. Granito       | 656  | 76   | 968  | 140  | This study            |
|             | 5. Cantiles      | 352  | 52   | 667  | 95   | This study            |
|             | 6. Machos        | 533  | 40   | 857  | 132  | This study            |
|             | 7. Partido       | 312  | 32   | 430  | 49   | This study            |
|             | 8. Rasito        | 153  | 11   | 194  | 15   | This study            |
|             | 9. San Esteban   | 2892 | 467  | 4991 | 1114 | This study            |
|             | 10. S.P. Martir  | 668  | 86   | 1505 | 274  | This study            |
|             | 11. S.P. Nolasco | 433  | 39   | 721  | 147  | This study            |
|             | 12. Farallon     | 249  | 73   | 544  | 174  | This study            |
|             | 13. Los Islotes  | 506  | 86   | 671  | 188  | This study            |
| <b>2017</b> | 13. Los Islotes  | 433  | 99   | -    | -    | This study            |
| <b>2018</b> | 13. Los Islotes  | 400  | 97   | -    | -    | This study            |
| <b>2019</b> | 13. Los Islotes  | 455  | 110  | -    | -    | This study            |
